# Supplementary material for: The NO reduction by CO over NiOx/CeO2 catalysts with a fixed Ni surface density: pretreatment effects on the catalyst structure and catalytic activity
Source: Royal Society of Chemistry journal article supplement (doi:10.1039/d3cy01103h), 2023-11-15
Supplement: d3cy01103h1.pdf [file d3cy01103h1.pdf]

## Support Information

### NO reduction by CO over NiO<sub>x</sub>/CeO<sub>2</sub> catalyst with fixed Ni surface density: Pretreatment effect on catalyst structure and catalytic activity

Kyung-Min Lee<sup>†,a</sup>, Byeongseok Kim<sup>†,a,b</sup>, Juwon Lee<sup>a,b</sup>, Gihan Kwon<sup>c</sup>, Kwangsuk Yoon<sup>d</sup>,  
Hocheol Song<sup>d</sup>, Kyung Hoon Min<sup>b</sup>, Sang Eun Shim<sup>b</sup>, Sungwon Hwang<sup>b</sup>, and Taejin Kim<sup>\*,a</sup>

<sup>a</sup> Materials Science and Chemical Engineering Department, Stony Brook University, Stony Brook, NY, 11794, U.S.A

<sup>b</sup> Department of Chemistry and Chemical Engineering, Education and Research Center for Smart Energy and Materials, Inha University, Incheon, 22212, South Korea

<sup>c</sup> National Synchrotron Light Source II, Brookhaven National Laboratory, Upton, NY 11973, U.S.A

<sup>d</sup> Department of Earth Resources and Environmental Engineering, Hanyang University, Seoul 04763, Republic of Korea

<sup>†</sup> co-first author, \* corresponding author

Corresponding Author: \* TJK: Materials Science and Chemical Engineering Department, Stony Brook University, Stony Brook, NY 11794, [taejin.kim@stonybrook.edu](mailto:taejin.kim@stonybrook.edu)

**Table S1.** Catalytic performance comparison with previous works for the NO reduction by CO reaction.

| Catalyst                                          | Gas composition |        | GHSV<br>(ml/g/h) | T <sub>NO,50</sub> *<br>(°C) | T <sub>CO,50</sub> **<br>(°C) | Ref.              |
|---------------------------------------------------|-----------------|--------|------------------|------------------------------|-------------------------------|-------------------|
|                                                   | NO (%)          | CO (%) |                  |                              |                               |                   |
| Pt/CeO <sub>2</sub>                               | 0.5             | 0.5    | 31,200           | 333                          | 344                           | 1                 |
| Cr/CeO <sub>2</sub>                               | 0.15            | 0.15   | 120,000          | 498                          | 403                           | 2                 |
| FeO <sub>x</sub> /CeO <sub>2</sub>                | 5               | 5      | 60,000           | 228                          | 442                           | 3                 |
| CuO/CeO <sub>2</sub>                              | 0.5             | 0.5    | 30,860           | 222                          | 294                           | 4                 |
| CuO/CeO <sub>2</sub>                              | 5               | 10     | 24,000           | 140                          |                               | 5                 |
| CuO/CeO <sub>2</sub>                              | 5               | 10     | 12,000           | 125                          |                               | 6                 |
| CuO/CeO <sub>2</sub>                              | 5               | 10     | 15,000           | 139                          |                               | 6                 |
| CuO/CeO <sub>2</sub>                              | 5               | 10     | 18,000           | 157                          |                               | 6                 |
| NiO/CeO <sub>2</sub>                              | 5               | 5      | 120,000          | 172                          | 148                           | 7                 |
| NiO/γ-Al <sub>2</sub> O <sub>3</sub>              | 0.25            | 0.25   | 45,000           | 446                          | 438                           | 7                 |
| NiO/TiO <sub>2</sub>                              | 0.25            | 0.25   | 45,000           | 480                          | 470                           | 7                 |
| Pd/CeZrO <sub>2</sub>                             | 1               | 1      | 150,000          | 102                          | 140                           | 8                 |
| Pd/Al <sub>2</sub> O <sub>3</sub>                 | 1               | 1      | 150,000          | 279                          | 298                           | 8                 |
| CuO/MnO                                           | 5               | 10     | 24,000           | 167                          | 340                           | 9                 |
| MnO <sub>x</sub>                                  | 5               | 10     | 24,000           | 215                          | 400                           | 9                 |
| CeZrO                                             | 5               | 10     | 12,000           | 375                          |                               | 10                |
| CuO/CeZrO                                         | 5               | 10     | 12,000           | 211                          |                               | 10                |
| CuO/TiO <sub>2</sub>                              | 6               | 6      | 42,000           | 290                          |                               | 11                |
| CuO/ZrO <sub>2</sub> /TiO <sub>2</sub>            | 6               | 6      | 42,000           | 207                          |                               | 11                |
| <b>5.3 NiO<sub>x</sub>/CeO<sub>2</sub>-400Oxi</b> | 5               | 5      | 60,000           | 165                          | 175                           | <b>This Study</b> |

\* Reaction temperature at which 50% of the NO was converted.

\*\* Reaction temperature at which 50% of the CO was converted.

## References

- 1 H.-o. Zhu, J.-R. Kim, and S.-K. Ihm, *Applied Catalysis B: Environmental*, 2009, 86, 87-92.
- 2 H. Yoshida, Y. Okabe, N. Yamashita, S. Hinokuma, and M. Machida, *Catalysis Today*, 2017, 281, 590-595.
- 3 S. Zhang and T. Kim, *Molecular Catalysis*, 2020, 494, 111123.
- 4 J. Chen, Y. Zhan, J. Zhu, C. Chen, X. Lin, and Q. Zheng, *Applied Catalysis A: General*, 2010, 377, 121-127.
- 5 X. Yao, F. Gao, Q. Yu, L. Qi, C. Tang, L. Dong, and Y. Chen, *Catalysis Science and Technology*, 2013, 3, 1355
- 6 L. Liu, Z. Yao, F. Gao, B. Liu, and L. Dong, *ChemCatChem*, 2011, 3, 978-989
- 7 Y. Wang, A. Zhu, Y. Zhang, C. Au, X. Yang and C. Shi, *Applied Catalysis B: Environmental*, 2008, 81, 141-149.
- 8 X. Chen, Y. Lyu, U. Nwabara and J. W. Schwank, *Catalysis Today*, 2019, 323, 148-158
- 9 T. Liu, Y. Yao, L. Wei, Z. Shi, L. Han, H. Yuan, B. Li, L. Dong, F. Wang, and C. Sun, *The Journal of Physical Chemistry C*, 2017, 121, 12757-12770
- 10 L. Liu, Z. Yao, B. Liu, and L. Dong, *Journal of Catalysis*, 2010, 275, 45-60
- 11 J. Xiaoyuan, D. Guanghui, L. Liping, C. Yingxu, and Z. Xiaoming, *Journal of Molecular Catalysis A: Chemical*, 2004, 218, 187-195
